# Supplementary material
Source: publisher figshare collection journal article supplement (https://acs.figshare.com/ndownloader/files/5649225)
Supplement: Supplementary file 1 [file 5649225]

**Supporting information for:**

**Influences of Gas Adsorption and Au Nanoparticles on**

**Electrical Properties of CVD-Grown MoS<sub>2</sub> Thin Films**

*Yunae Cho,<sup>†</sup> Ahrum Sohn,<sup>†</sup> Sujung Kim,<sup>†</sup> Myung Gwan Hahm,<sup>‡,§</sup> Dong-Ho Kim,<sup>‡</sup> Byungjin Cho,  
<sup>\*,‡</sup> and Dong-Wook Kim <sup>\*,†</sup>*

<sup>†</sup> Department of Physics, Ewha Womans University, Seoul 03760, Korea

<sup>‡</sup> Advanced Functional Thin Films Department, Korea Institute of Materials Science (KIMS),  
Changwon 51508, Korea

<sup>§</sup> Department of Materials Science & Engineering, Inha University, Incheon 22212, Korea

\* E-mail: bjcho@kims.re.kr (Byungjin Cho) and dwkim@ewha.ac.kr (Dong-Wook Kim)

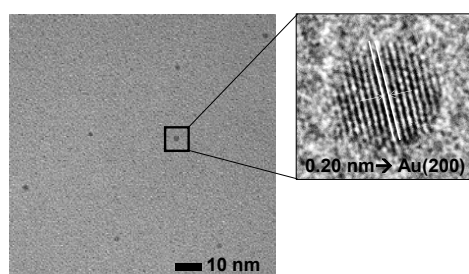

**Figure S1.** Transmission electron microscope (TEM) images of Au nanoparticles (NPs) on a carbon film, grown in the identical conditions for the preparation of the Au NPs on our MoS<sub>2</sub> thin films. The lattice spacing found from the high-resolution TEM image is identified to be around 0.20 nm, corresponding to the Au (200) atomic plane.

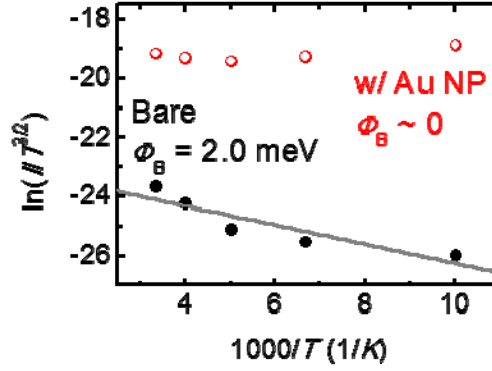

**Figure S2.** The current ( $I$ )-voltage ( $V$ ) characteristics of our device can be explained by the 2D thermionic model, as described by the following equation:

$$I = A_{2D}^* S T^{3/2} \exp \left[ -\frac{q}{k_B T} \left( \phi_B - \frac{V}{n} \right) \right]$$

where  $A_{2D}^*$  is the 2D equivalent Richardson constant,  $S$  is the contact area,  $T$  is the temperature,  $q$  is the electron charge,  $k_B$  is the Boltzmann constant,  $\phi_B$  is the Schottky barrier height, and  $n$  is the ideality factor [Kim *et al.*, *Sci. Rep.* **2016**, 16, 1890-1895]. From the Arrhenius plots of  $\ln(IT^{3/2})$  vs.  $T^{-1}$ ,  $\phi_B$  can be estimated. The estimated  $\phi_B$  values for the bare and coated samples are 2.0 and 0 meV, respectively. This indicates Ohmic contact formation in our devices.
